# Supplementary material for: Observation of lithiation-induced structural variations in TiO2 nanotube arrays by X-ray absorption fine structure
Source: Royal Society of Chemistry journal article supplement (doi:10.1039/c4ta04873c), 2014-10-23
Supplement: c4ta04873c1.pdf [file c4ta04873c1.pdf]

## **Supporting information (SI)**

---

### **Observation of lithiation induced structural variations in TiO<sub>2</sub> nanotube arrays by X-ray absorption fine structures**

*Dongniu Wang,<sup>1,2</sup> Lijia Liu,<sup>3</sup> Xueliang Sun<sup>2\*</sup> and Tsun-Kong Sham<sup>1\*</sup>*

<sup>1</sup>Department of Chemistry, Western University, London, Ontario, N6A 5B7 Canada.

<sup>2</sup>Department of Mechanical and Materials Engineering, Western University, London, Ontario, N6A 5B9 Canada.

<sup>3</sup>Soochow-Western Center for Synchrotron Radiation Research, Soochow University, and Institute of Functional Nano and Soft Materials, Soochow University, Suzhou, Jiangsu, 215123 China

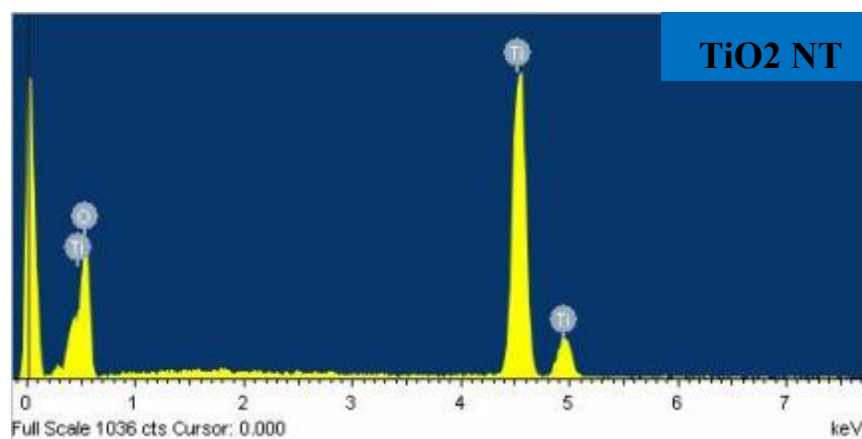

Figure S1 EDS spectra of the amorphous TiO<sub>2</sub> NT.

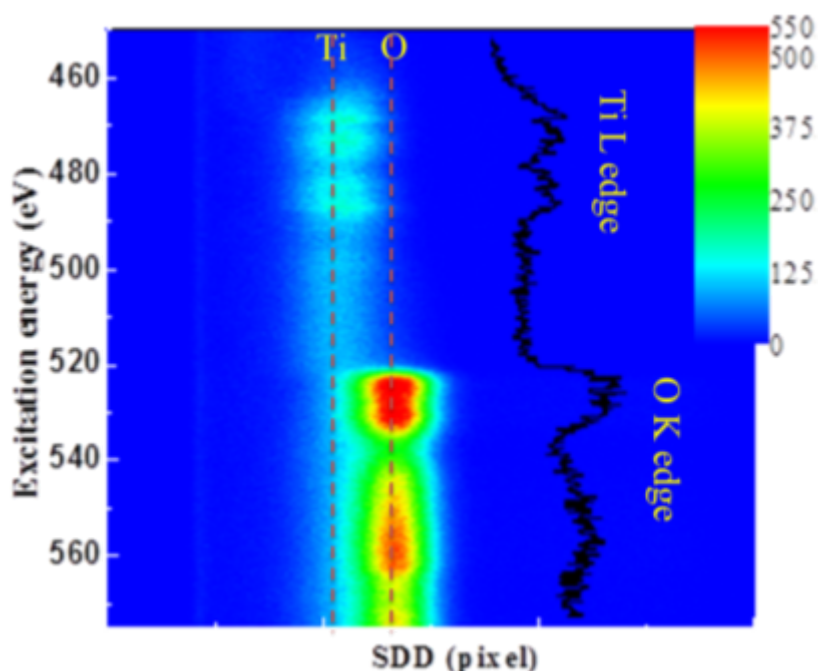

Figure S2 2-D display of excitation energy across the Ti L<sub>3,2</sub>-edge and O K edge (y-axis) vs. fluorescence/scattered X-ray energy (x-axis) from Ti and O detected with a silicon drift detector (SDD). The fluorescence X-ray energy from Ti L<sub>3,2</sub> shell and O K shell, respectively, are marked with a vertical dotted line with the intensity colour coded. The Ti L and O K edge XANES is also shown (black trace).

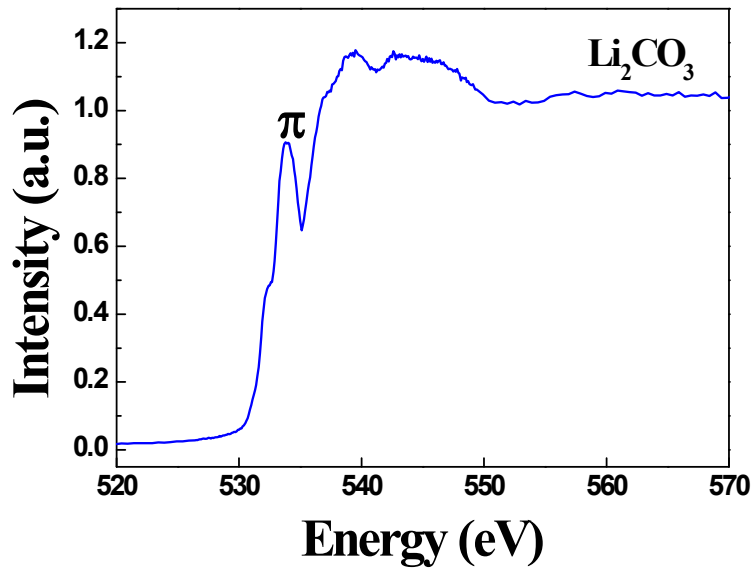

Figure S3 O K edge XANES of  $\text{Li}_2\text{CO}_3$  powder.

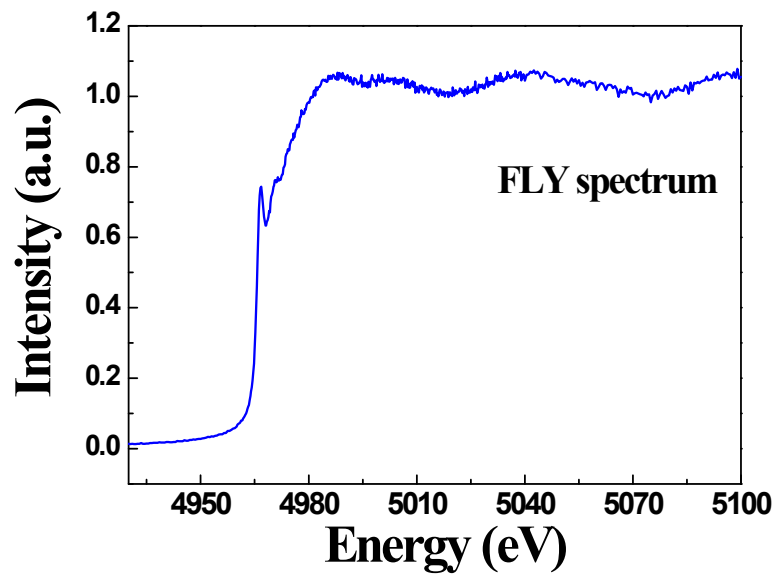

Figure S4 FLY spectrum of amorphous  $\text{TiO}_2$  rooted on Ti foil.

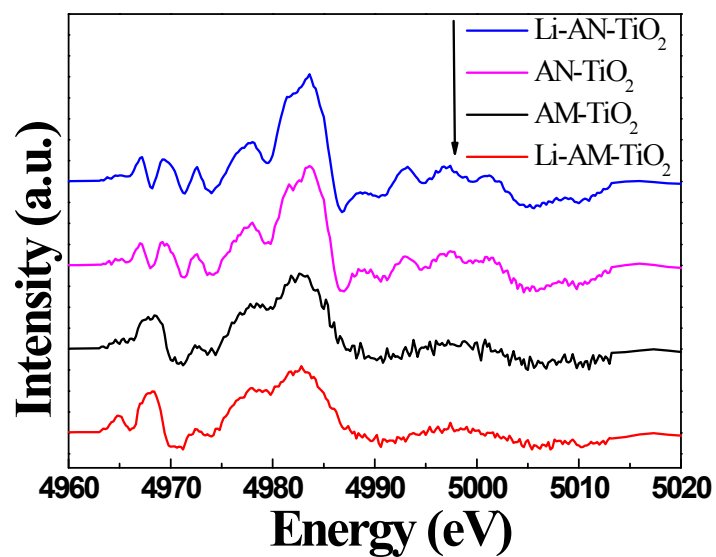

Figure S5 First derivative spectra of Ti K edge XAFS for amorphous and anatase  $\text{TiO}_2$ , both before and after lithiation

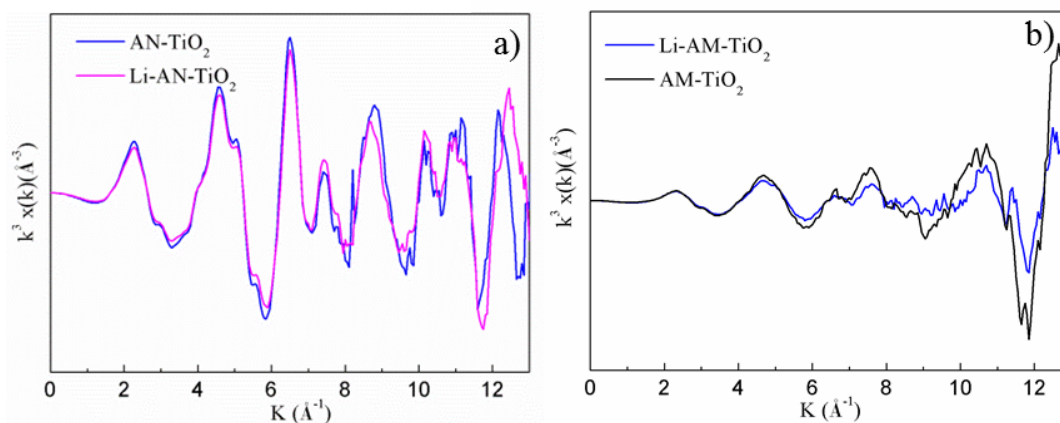

Figure S6. Ti K-edge EXAFS spectra ( $k^3$ -weighted) of (a) anatase and (b) amorphous  $\text{TiO}_2$  both before and after lithiation.
